# Supplementary material for: Side-by-Side Comparison of the Biological Characteristics of Human Umbilical Cord and Adipose Tissue-Derived Mesenchymal Stem Cells
Source: Hindawi journal article supplement (doi:10.1155/2013/438243), 2013-01-01
Supplement: f1 [file 438243.f1.pdf]

**Supplementary Table 1: Primer sequences (5'–3') used for Real-time PCR**

| Genes              | Sequences                                                |
|--------------------|----------------------------------------------------------|
| Alkaline Phosphate | GACCCTTGACCCCCACAAT(F)<br>GCTCGTACTGCATGTCCCCT(R )       |
| Osteocalcin        | GGCAGCGAGGTAGTGAAGAG(F)<br>CTGGAGAGGAGCAGAACTGG(R )      |
| Leptin             | GTGCGGATTCTTGTGGCTTT (F)<br>GGAATGAAGTCCAAACCGTG (R )    |
| RUNx2              | AGATGATGACACTGCCACCTCTG(F)<br>GGGATGAAATGCTTGGAAGTGC(R ) |

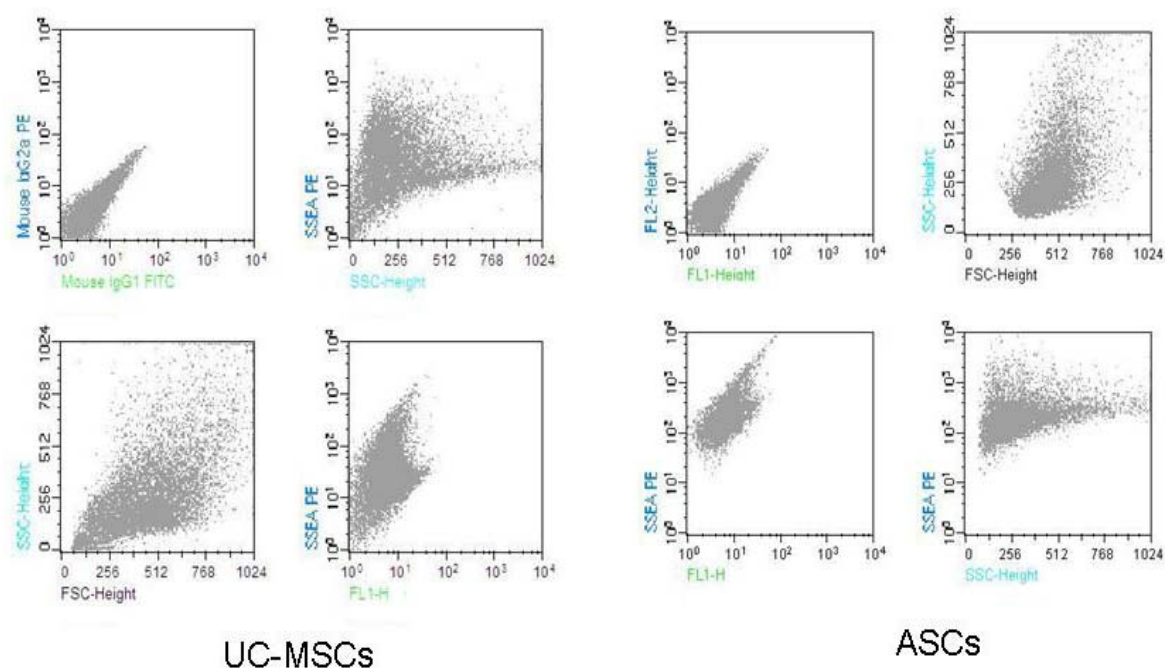

**Supplementary Figure 1: Immunophenotyping with SSEA-PE antibody.** The left-hand side four pictures are representative images from UC-MSCs and the right-hand side four pictures are representative images from ASCs.
